# Supplementary material for: A specific serum lipid signature characterizes patients with glycogen storage disease type Ia
Source: PubMed Central journal article supplement (PMC11526085; doi:10.1016/j.jlr.2024.100651), 2024-09-19

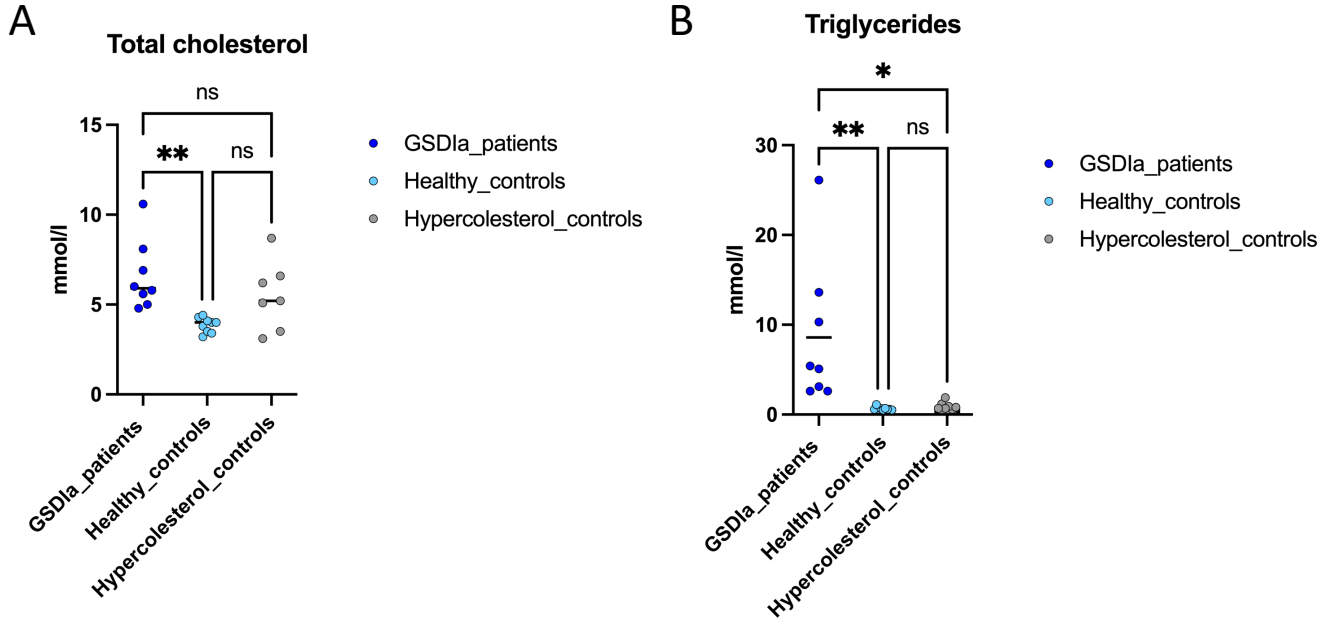









- GSDIa\_patients
- Healthy\_controls
- Hyperlipid\_controls

K

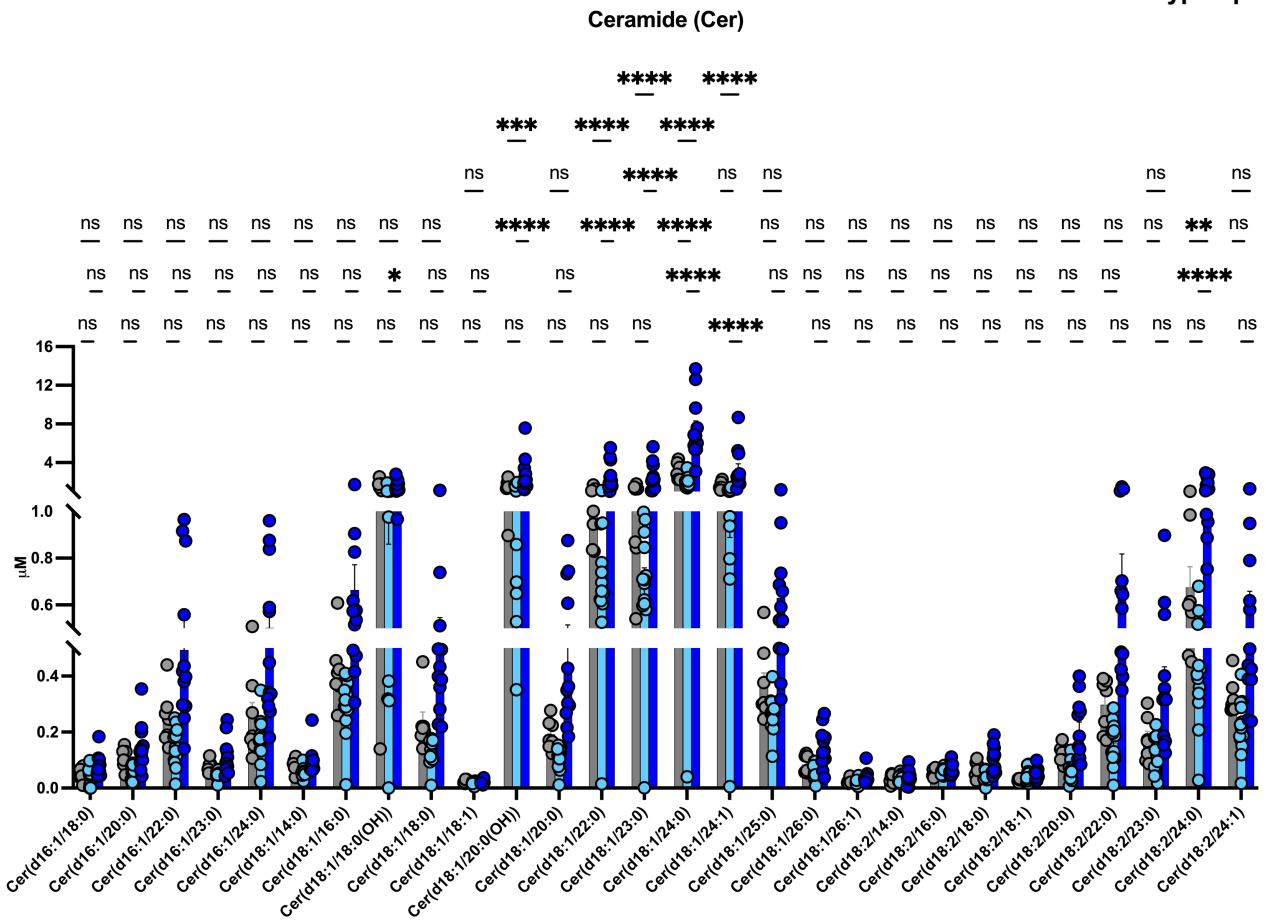

L

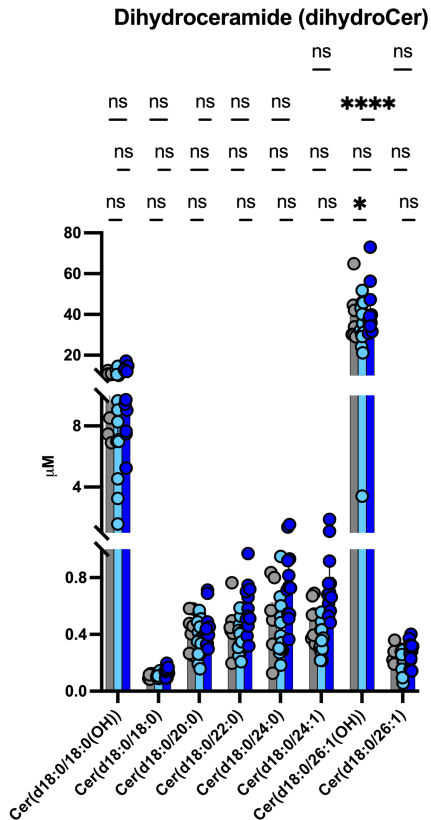

# Supplementary Figure S3

**A**

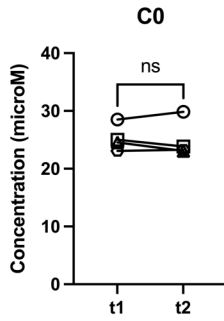

**%Difference vs. average: Bland-Altman of C0**

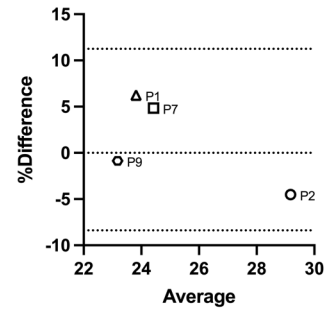

**B**

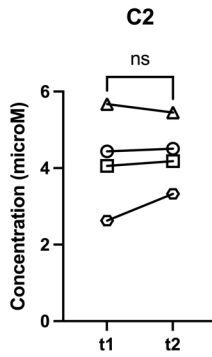

**%Difference vs. average: Bland-Altman of C2**

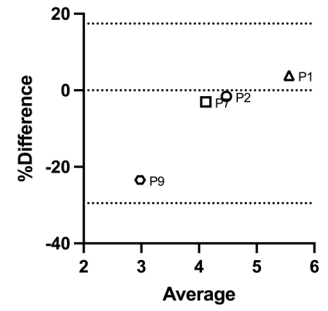

**C**

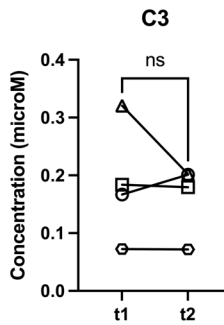

**%Difference vs. average: Bland-Altman of C3**

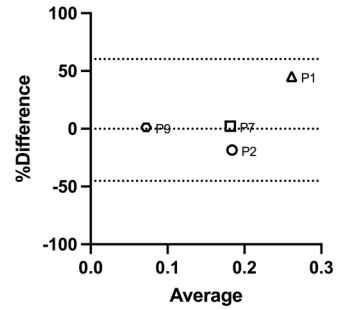

**D**

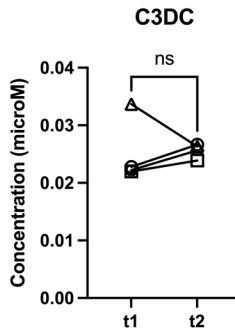

**%Difference vs. average: Bland-Altman of C3DC**

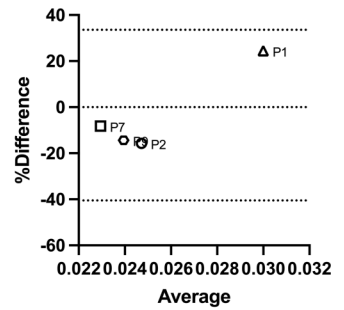

**E**

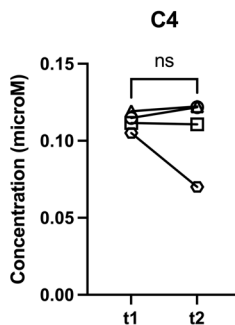

**%Difference vs. average: Bland-Altman of C4**

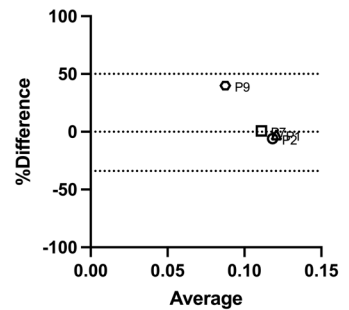

# Supplementary Figure S3

F

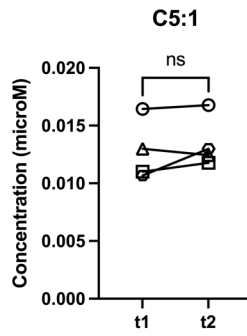

%Difference vs. average: Bland-Altman of C5:1

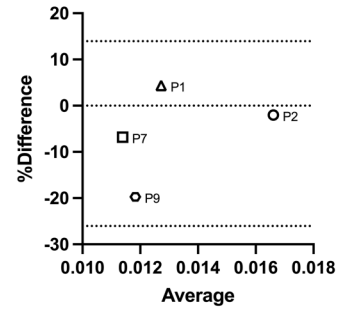

G

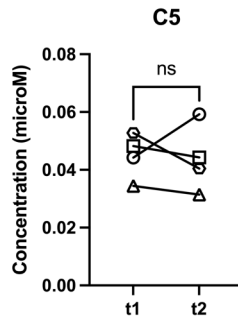

%Difference vs. average: Bland-Altman of C5

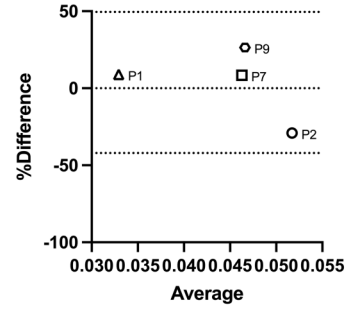

H

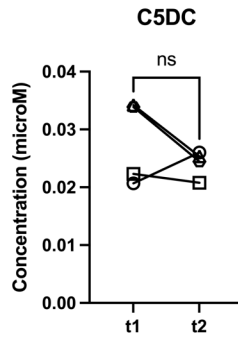

%Difference vs. average: Bland-Altman of C5DC

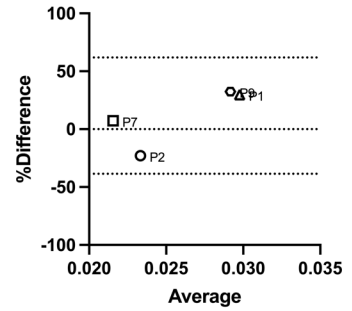

I

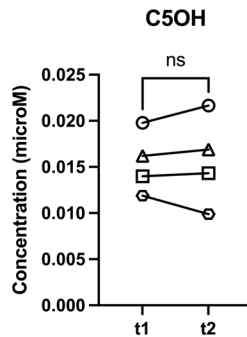

%Difference vs. average: Bland-Altman of C5OH

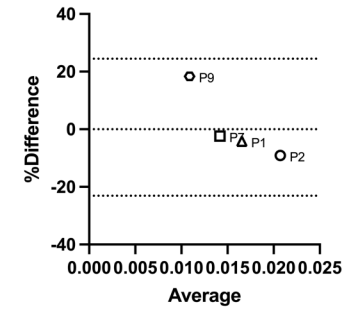

J

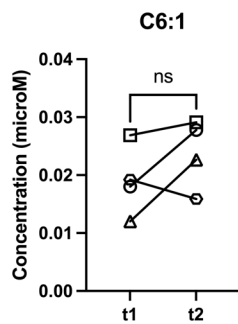

%Difference vs. average: Bland-Altman of C6:1

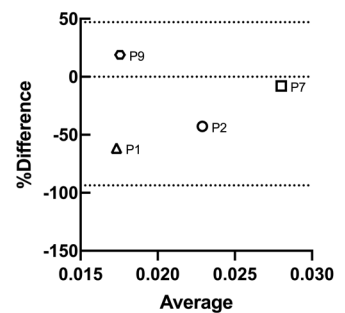



# Supplementary Figure S3

K

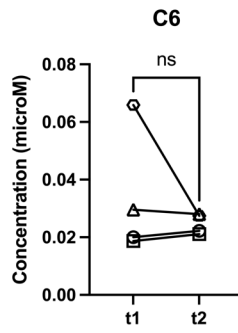

%Difference vs. average: Bland-Altman of C6

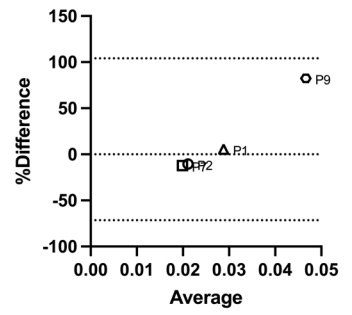

L

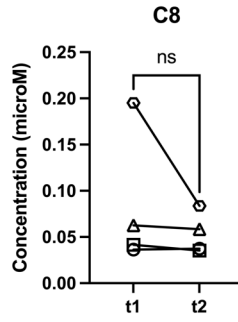

%Difference vs. average: Bland-Altman of C8

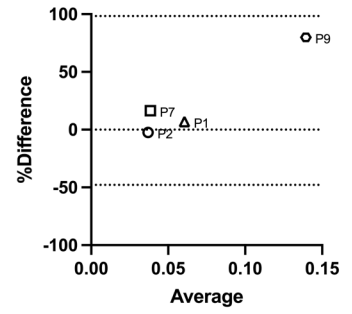

M

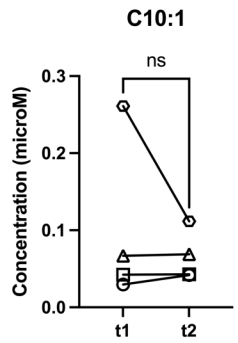

%Difference vs. average: Bland-Altman of C10:1

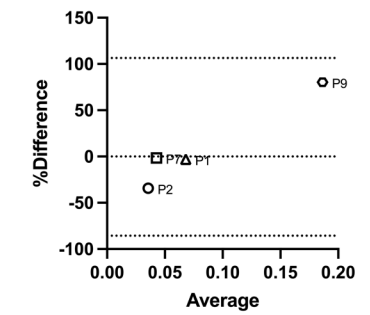

N

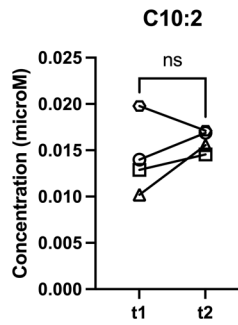

%Difference vs. average: Bland-Altman of C10:2

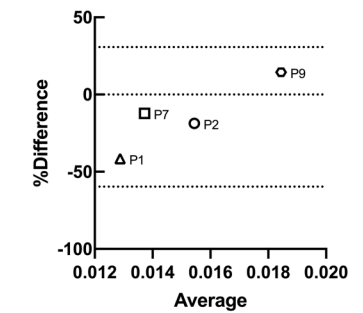

O

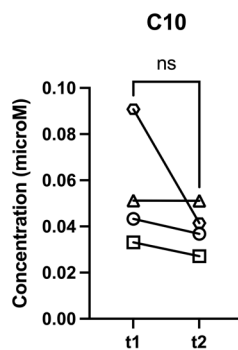

%Difference vs. average: Bland-Altman of C10

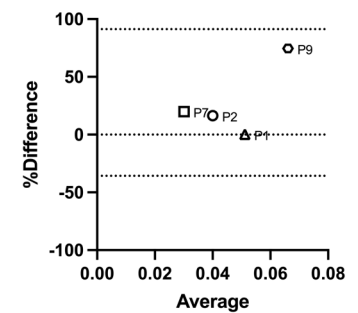

# Supplementary Figure S3

P

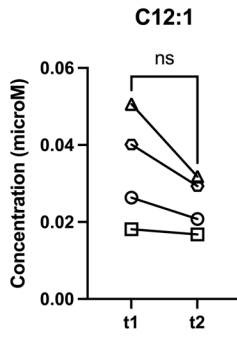

%Difference vs. average: Bland-Altman of C12:1

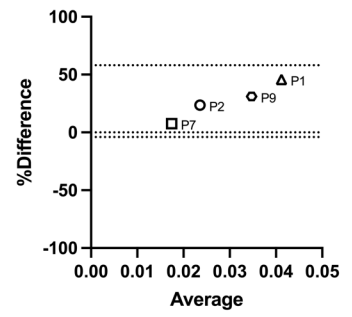

Q

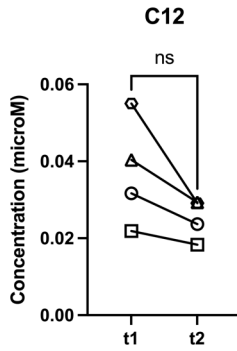

%Difference vs. average: Bland-Altman of C12

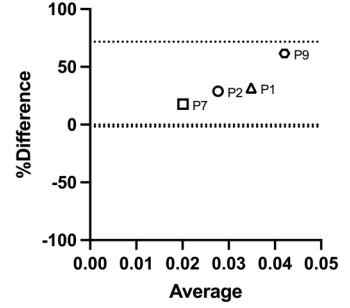

R

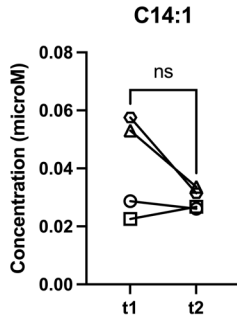

%Difference vs. average: Bland-Altman of C14:1

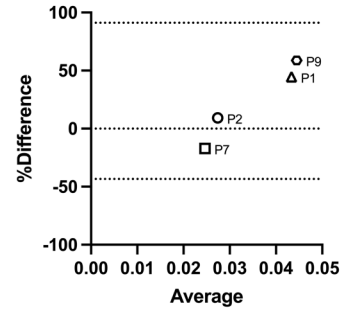

S

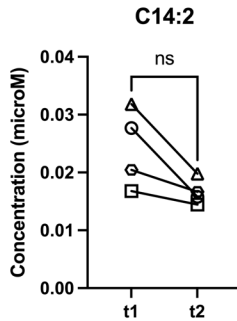

%Difference vs. average: Bland-Altman of C14:2

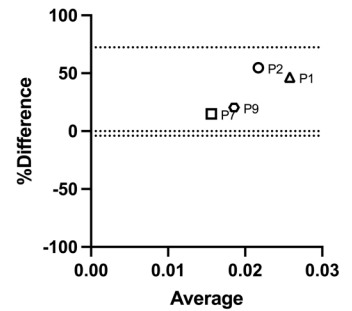

T

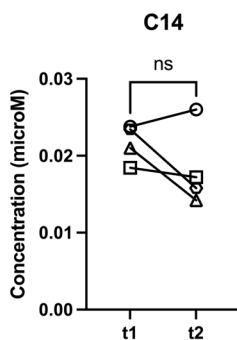

%Difference vs. average: Bland-Altman of C14

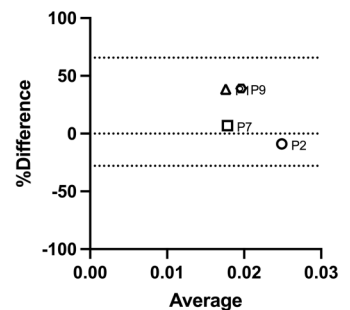

# Supplementary Figure S4

## A Carnitine and Acylcarnitines

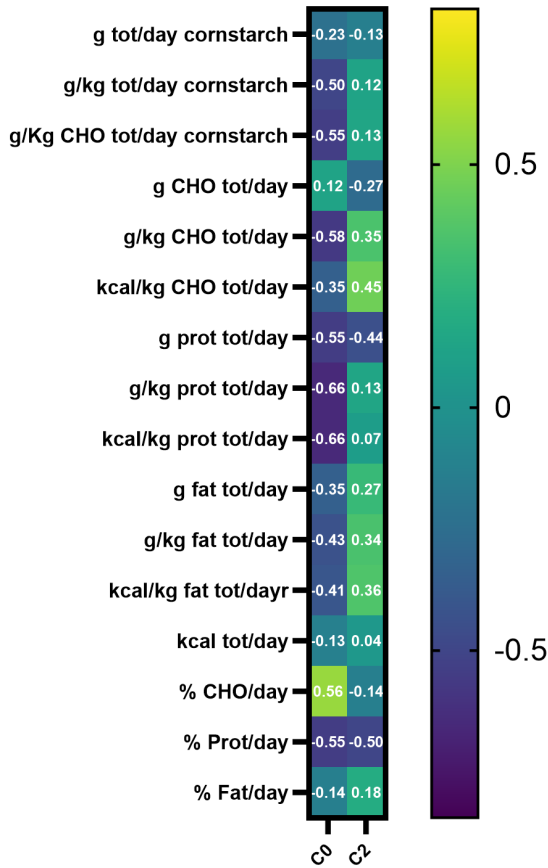

## B Cholesterol Esters

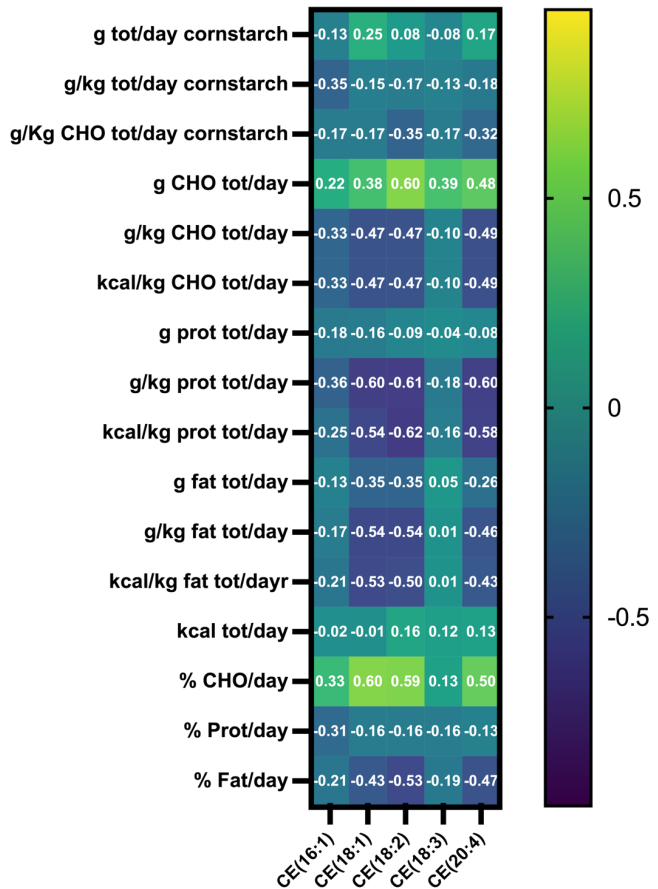

## C Fatty Acids

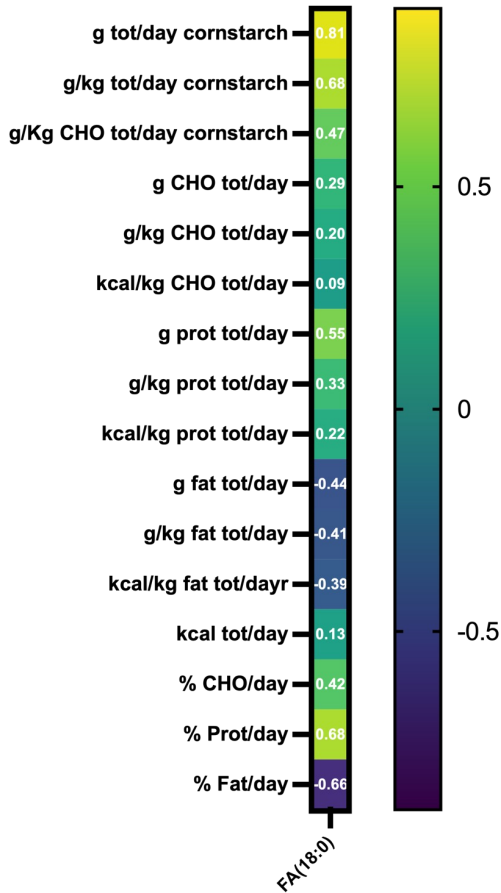

## Diacylglycerols

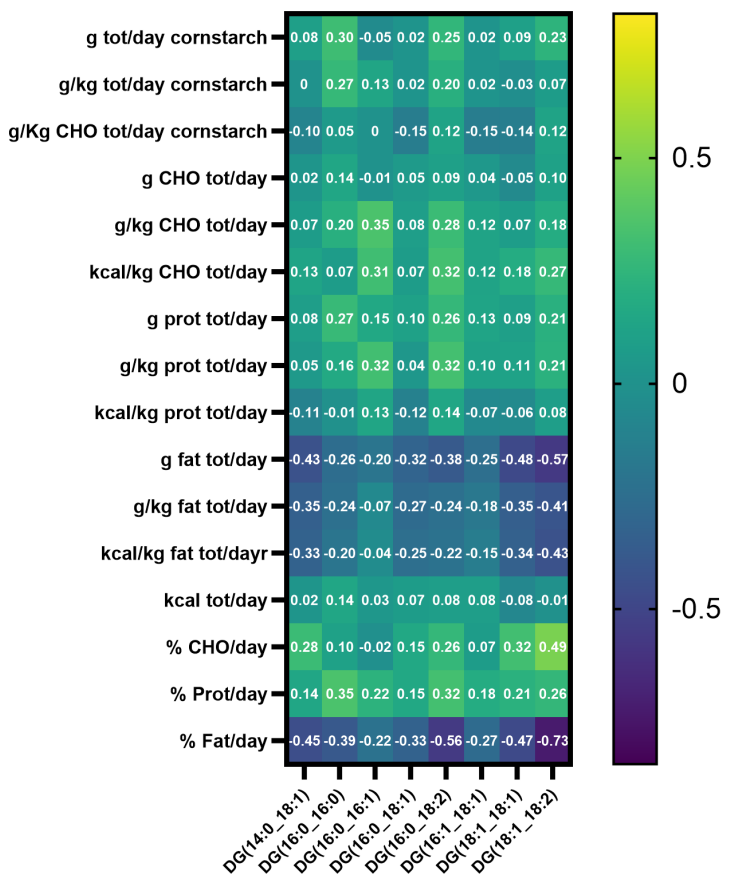

E

Triacylglycerols

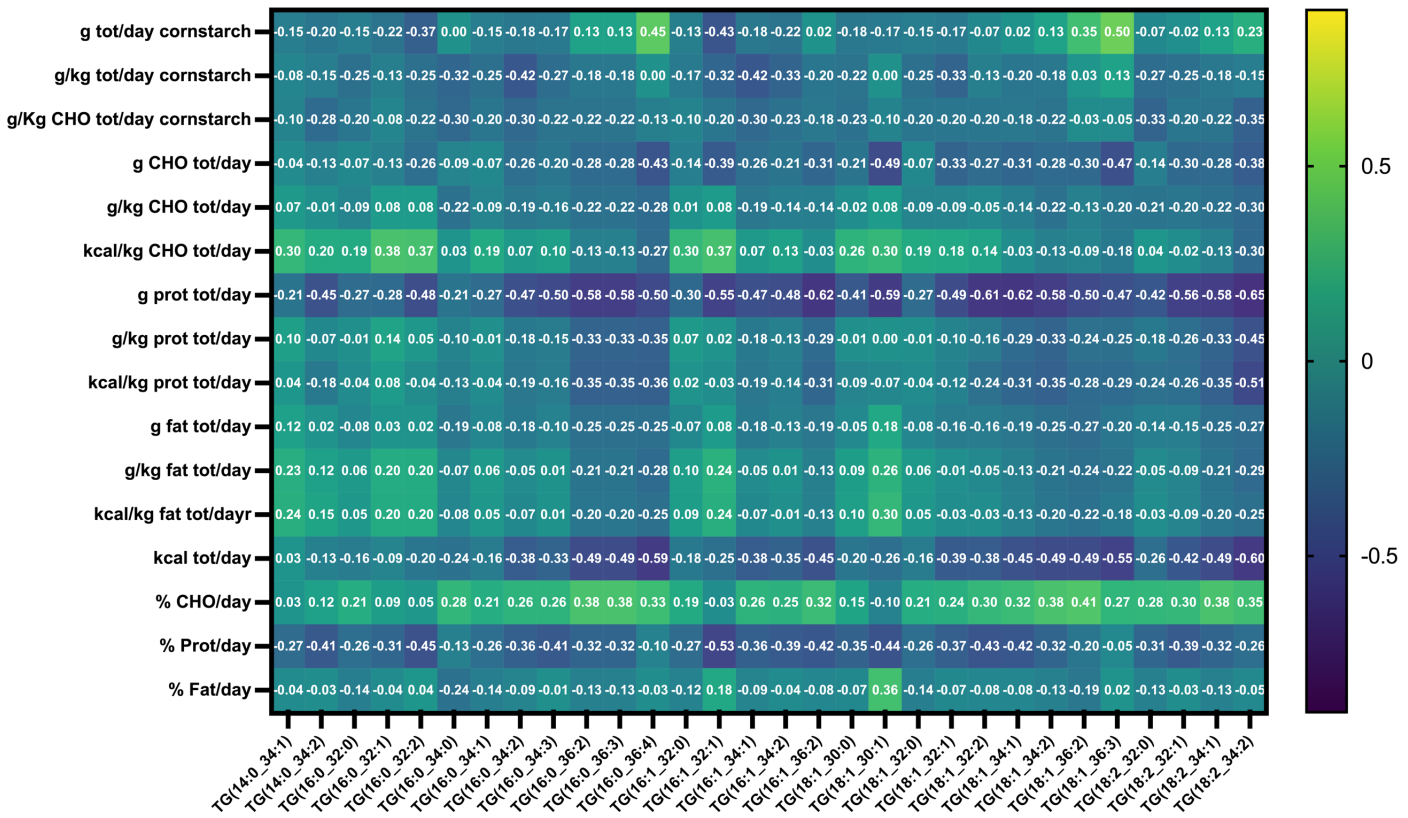

F

Spingomyelin

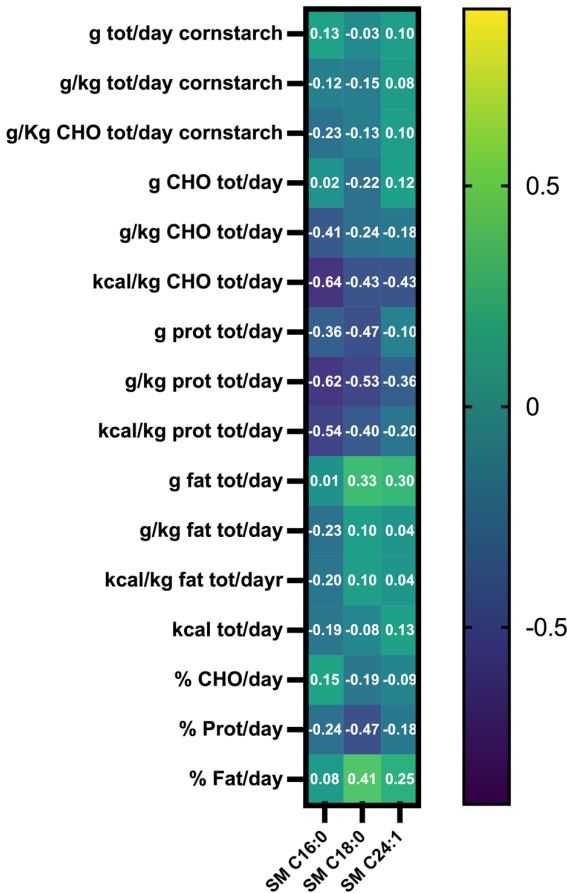

G

Bile Acids

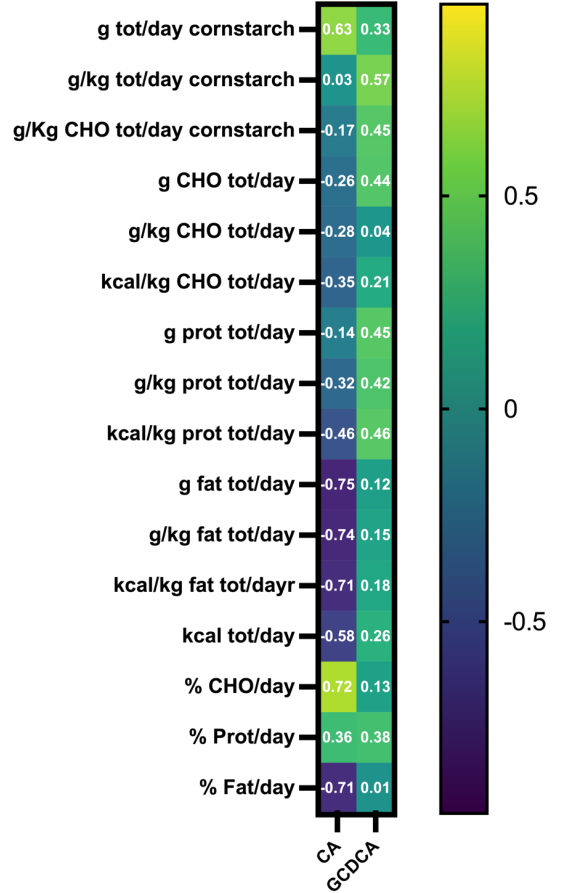

**H** Lysophosphatidylcholine

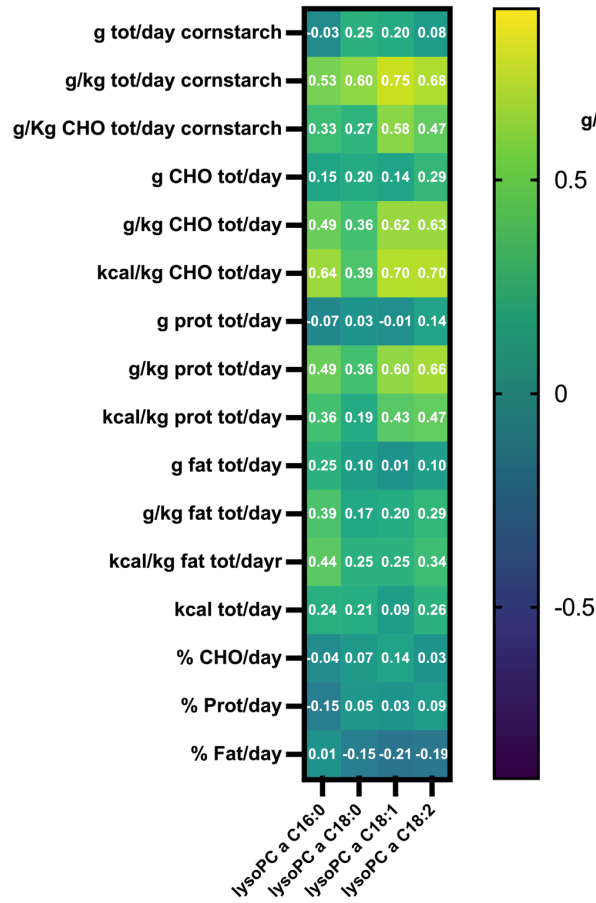

**I** diacyl-Phosphatidylcholine

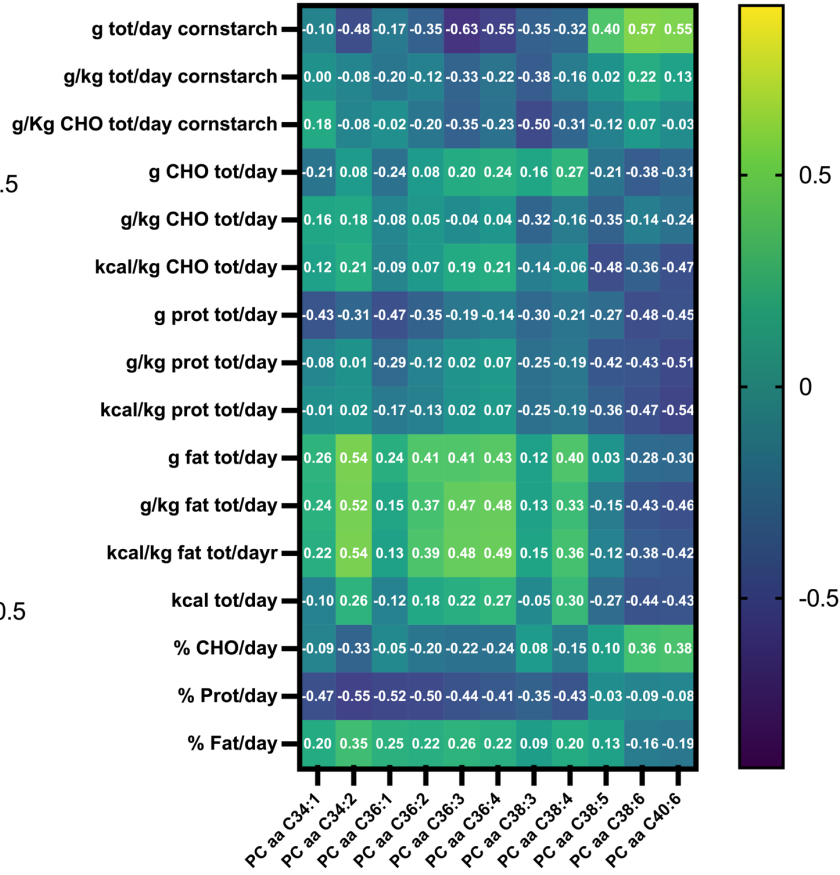

**J** Acyl, alkyl-Phosphatidylcholine

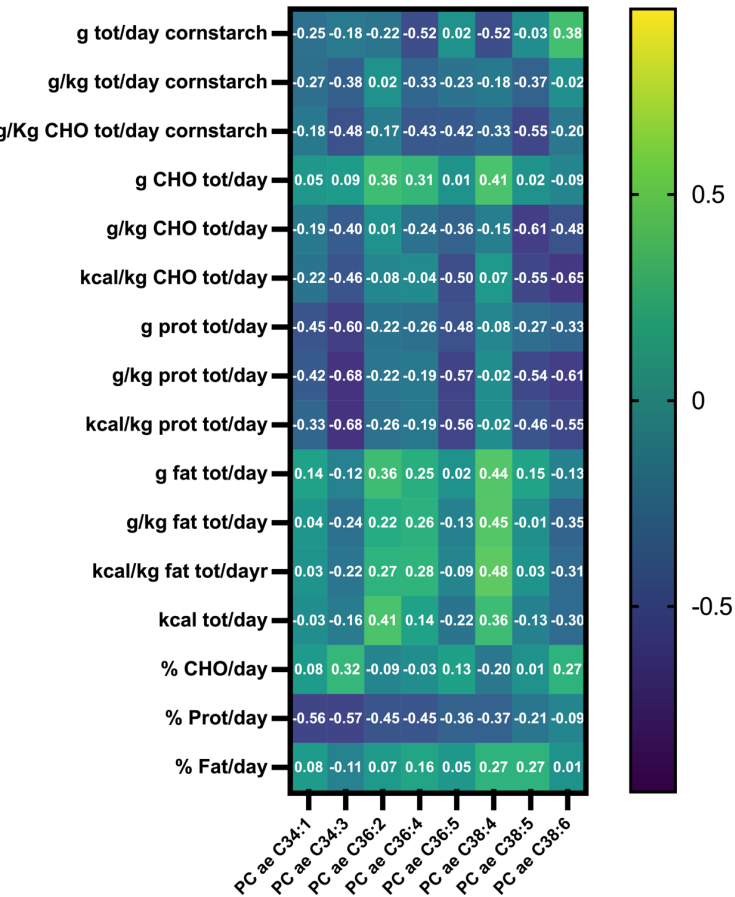

**K** HexoxylCeramides, Dihexoxylceramides, Trihexoxylceramides

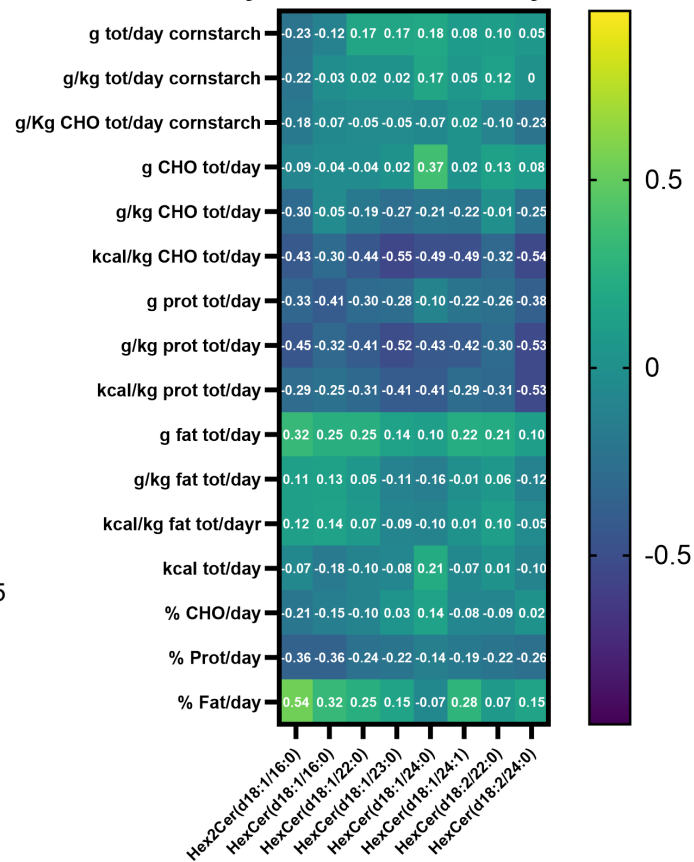

# Supplementary Figure S4

L

## Ceramides

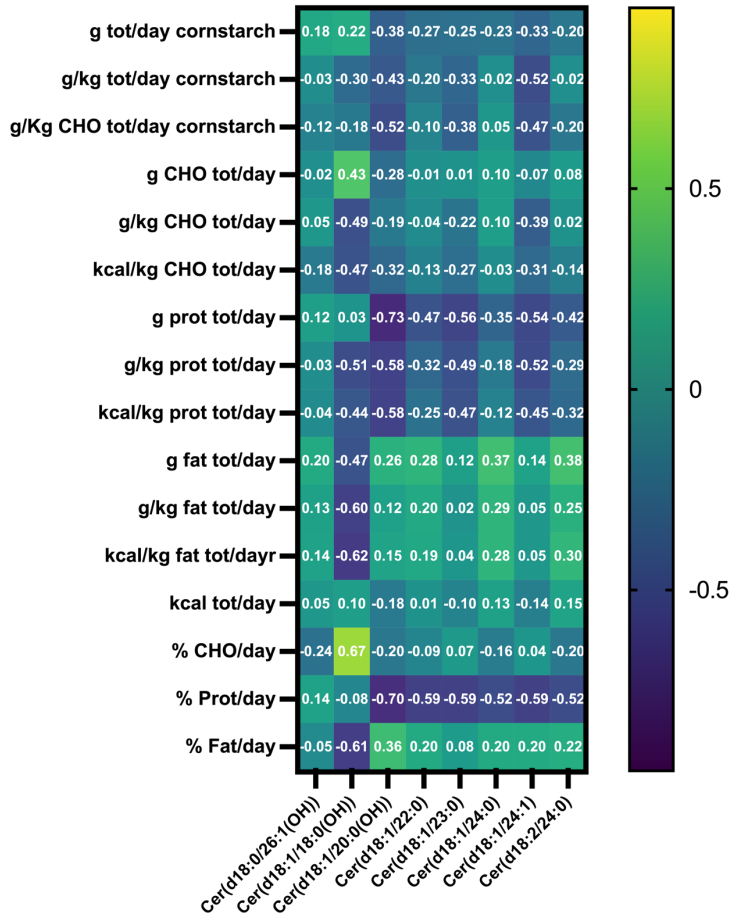

# Supplementary Figure S5

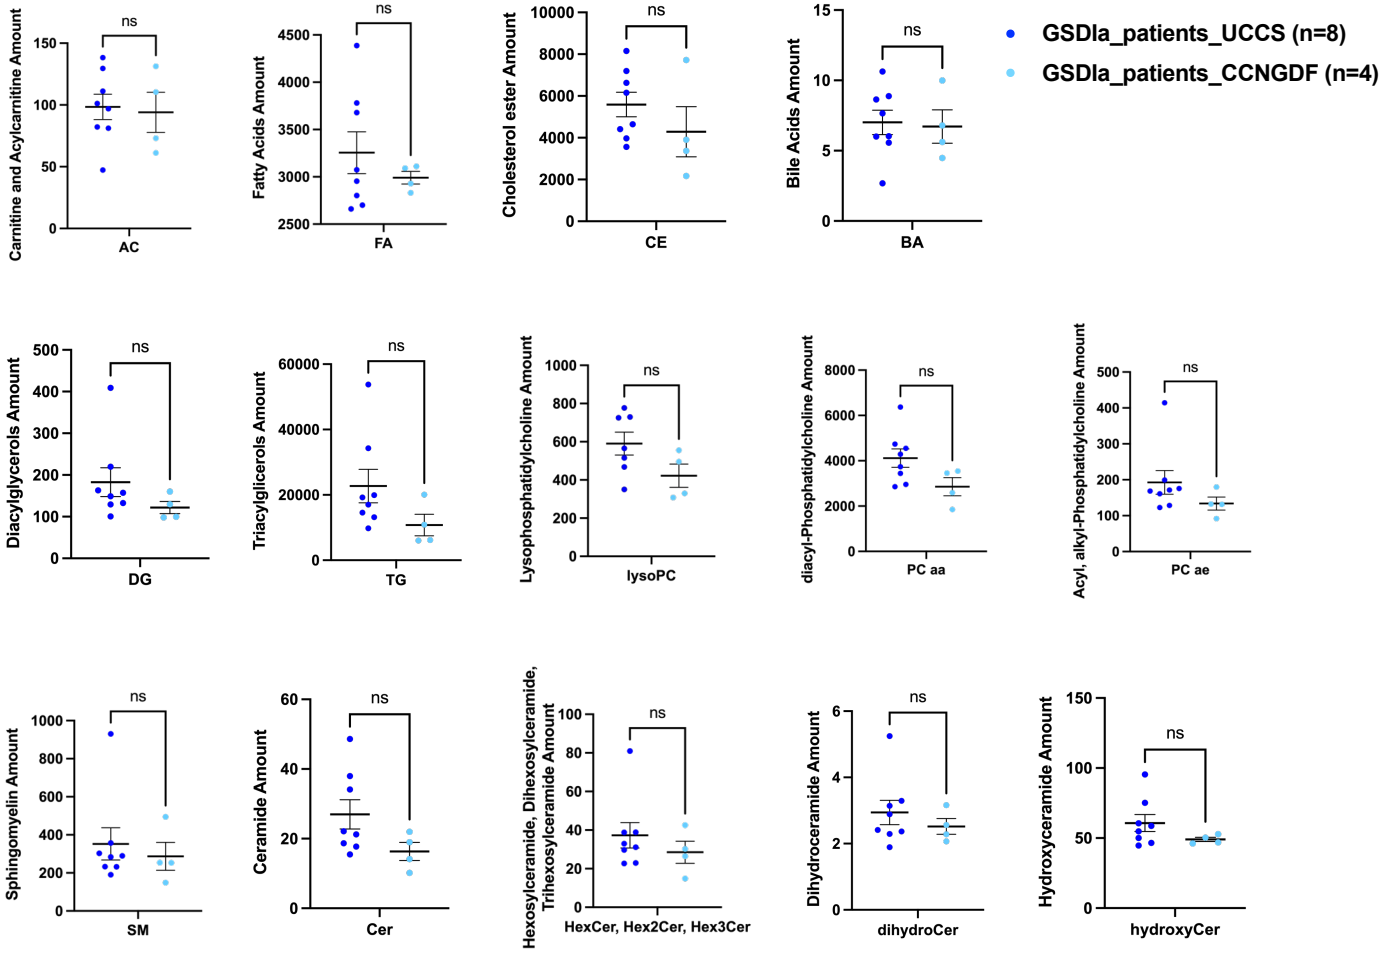











K

- HC\_Infant
- GSDIa\_Infant

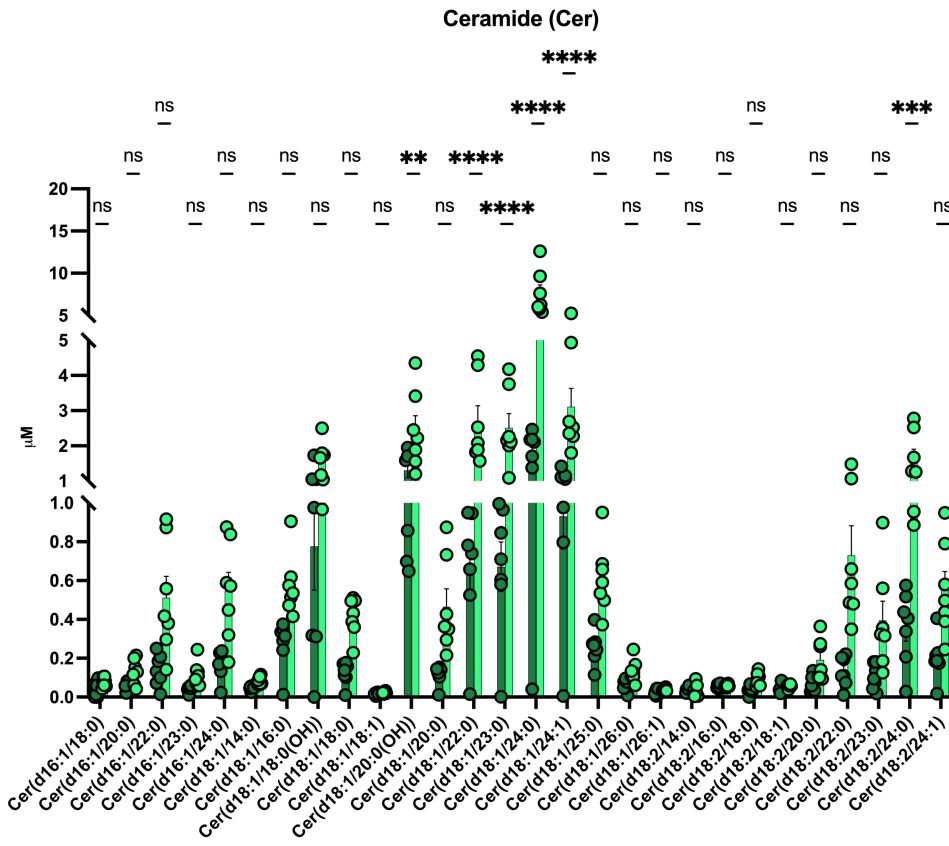

L

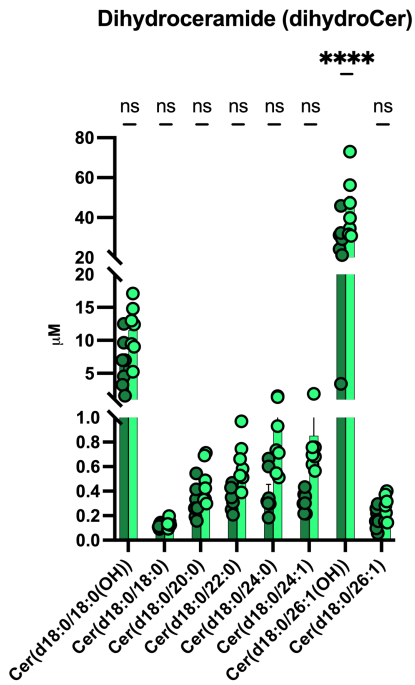





# Supplementary Figure S7

G

- HC\_Adult
- GSDIa\_Adult

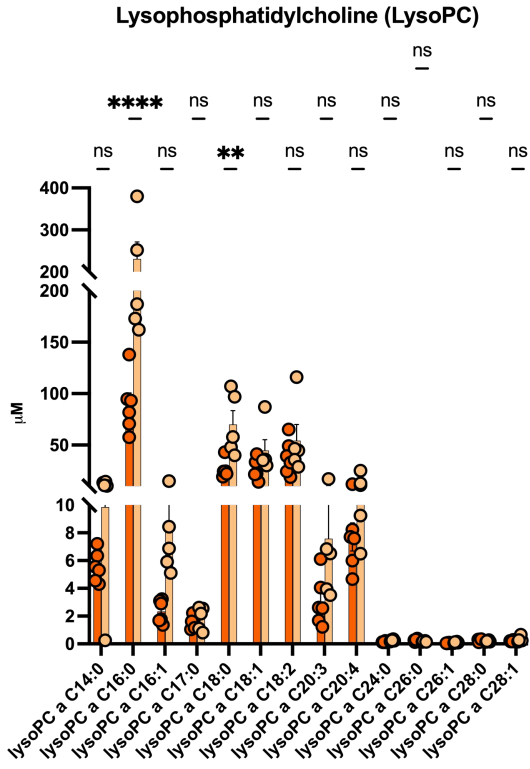

H

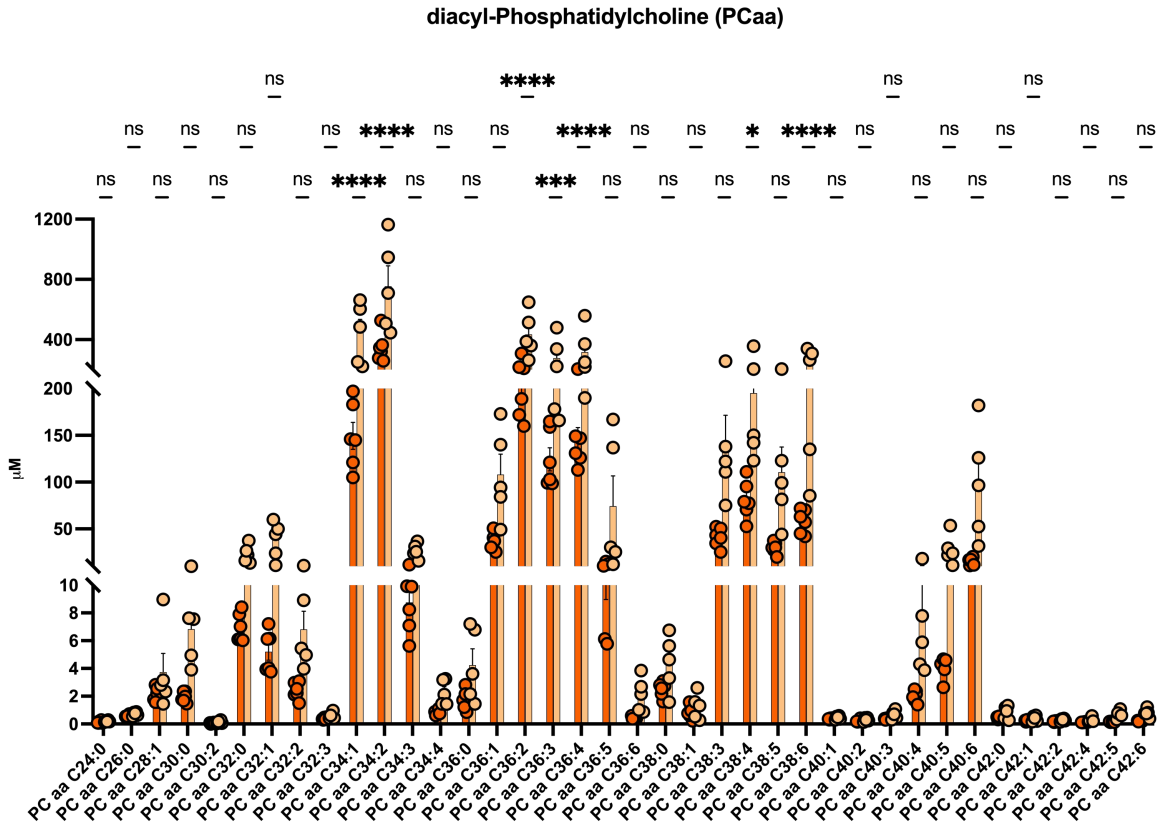

# Supplementary Figure S7

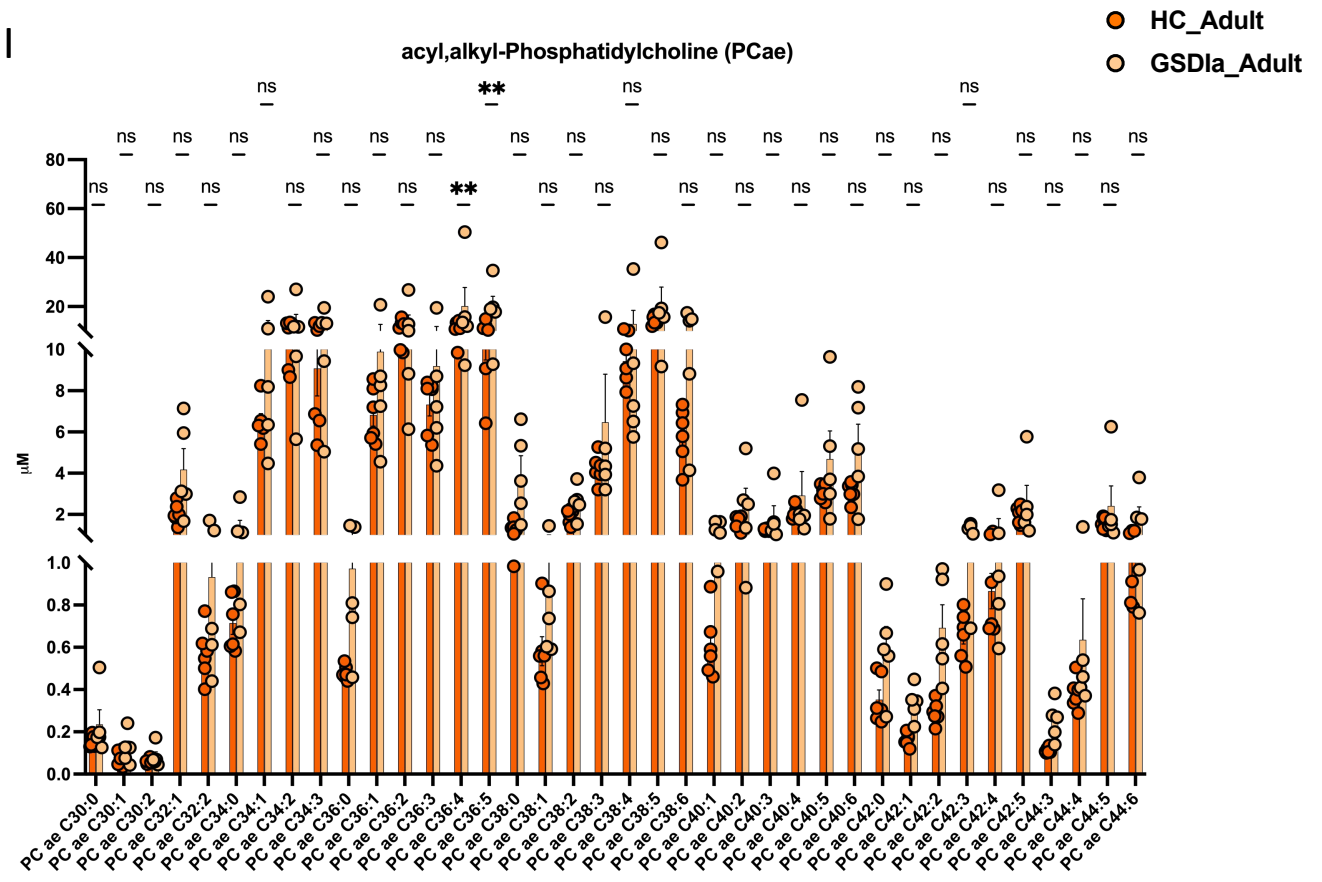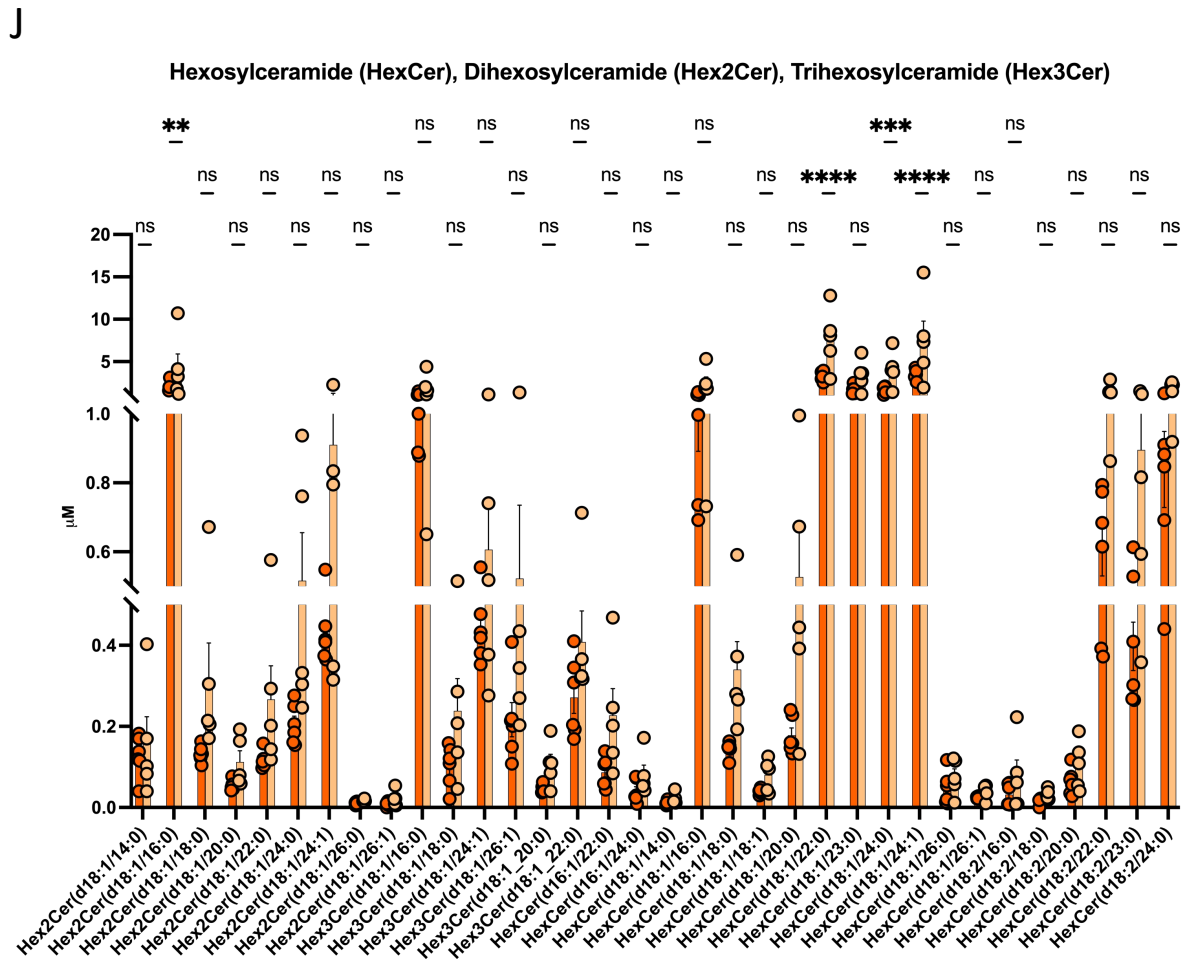











# Supplementary Figure S8

## acyl,alkyl-Phosphatidylcholine (PCae)

● GSDIa\_Infant  
● GSDIa\_Adult

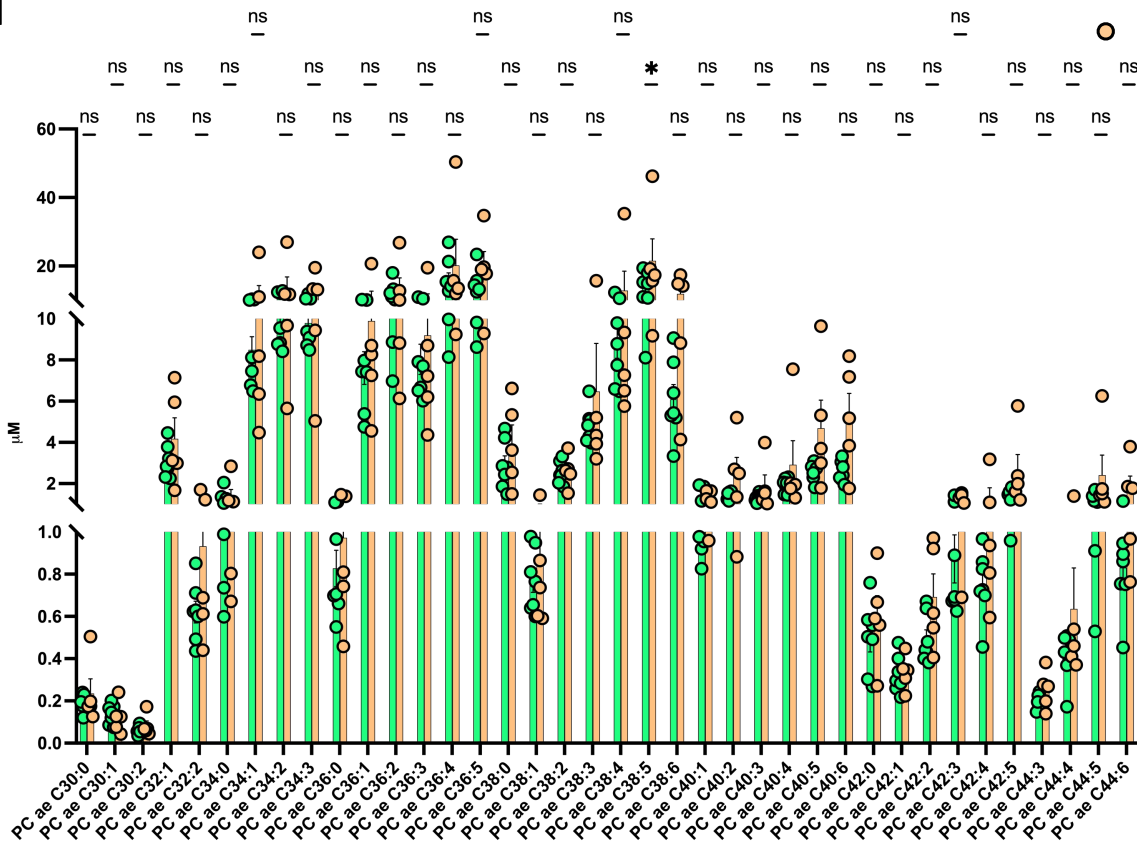

J

## Hexosylceramide (HexCer), Dihexosylceramide (Hex2Cer), Trihexosylceramide (Hex3Cer)

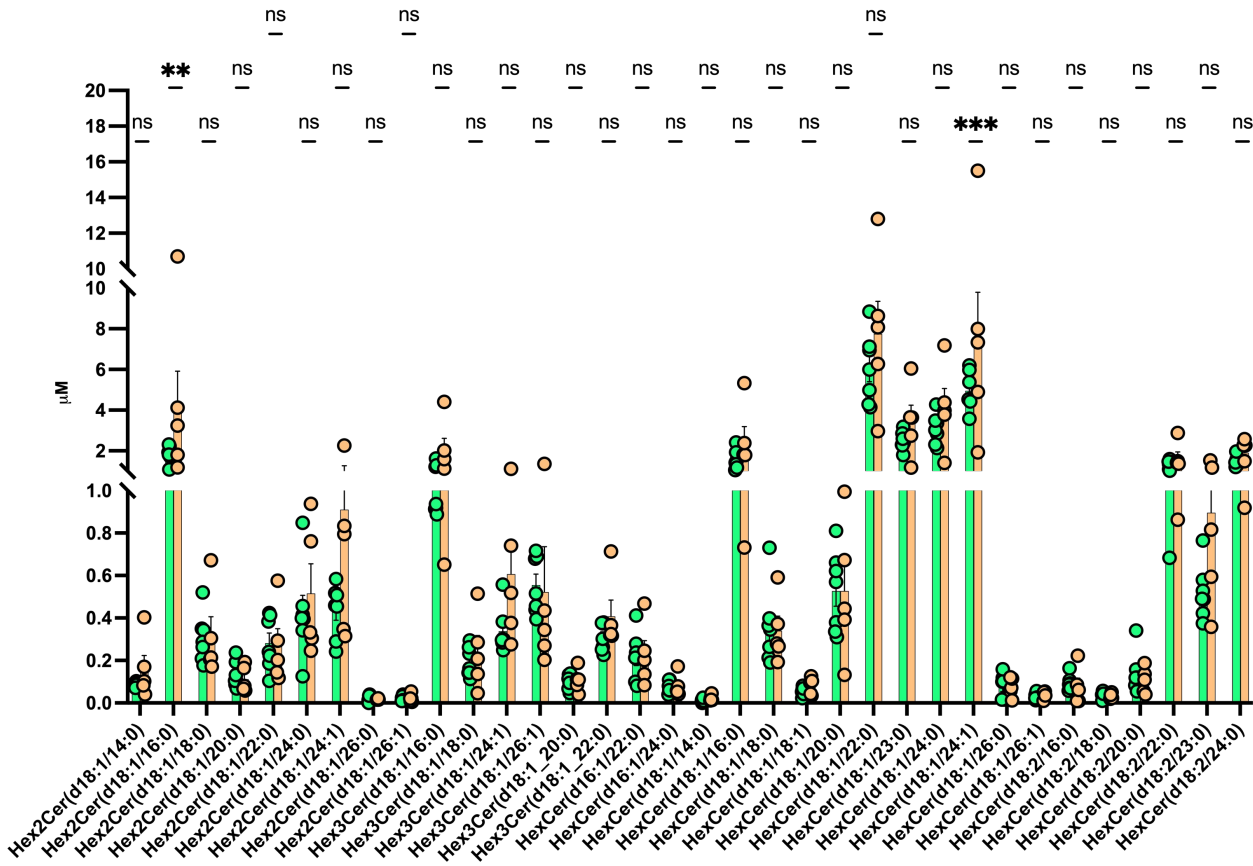

Supplement: mmc1.pdf [file mmc1.pdf]
